# Supplementary material for: Ultra High-Resolution Gene Centric Genomic Structural Analysis of a Non-Syndromic Congenital Heart Defect, Tetralogy of Fallot
Source: PubMed Central journal article supplement (PMC3909147; doi:10.1371/journal.pone.0087472), 2014-01-31
Supplement: pone.0087472.s004.pdf [file pone.0087472.s004.pdf]

| <b>Name</b>                      | <b>Chromosome</b> | <b>Fragment Size</b> | <b>Forward</b>           | <b>Reverse</b>          |
|----------------------------------|-------------------|----------------------|--------------------------|-------------------------|
| JAG1                             | Chr20             | 125bp                | CTCCTTGAGGCATTGA         | TGTCATGCAGAACGTGAA      |
| GATA6                            | Chr18             | 145bp                | ATCTCTTCCTCGTCCTC        | GATGCGAAGCGTAGGAACT     |
| NOTCH1                           | Chr9              | 142bp                | AACGAGGTCGGCTCCTA        | CACACTCGTGGGTGACG       |
| TBX2                             | Chr17             | 135bp                | CTGTAGCCCAGTCCCAATAC     | GCGGCTACAATCTCCATCA     |
| NKX2-1                           | Chr14             | 101bp                | TGGTCTACGTGTCTGTCAGTCTGT | CGCTCGGATTCTCTCCGGTA    |
| OFD1 (control for normalization) | ChrX              | 137bp                | AGGTGTTCTGCTGCTGAGATGGAA | TCCCTTTGTGCCAGATGAAGAGA |

**Supplemental Table 4. Summary of Chromosomal Distribution of CNVs**

| <b>Chromosome</b> | <b>Duplicated CNVs</b> | <b>Deleted CNVs</b> | <b>Total CNVs</b> |
|-------------------|------------------------|---------------------|-------------------|
| 1                 | 1                      | 24                  | 25                |
| 2                 | 2                      | 21                  | 23                |
| 3                 | 11                     | 32                  | 43                |
| 4                 | 26                     | 15                  | 41                |
| 5                 | 41                     | 24                  | 65                |
| 6                 | 14                     | 44                  | 58                |
| 7                 | 4                      | 14                  | 18                |
| 8                 | 12                     | 30                  | 42                |
| 9                 | 1                      | 12                  | 13                |
| 10                | 10                     | 9                   | 19                |
| 11                | 2                      | 9                   | 11                |
| 12                | 5                      | 5                   | 10                |
| 13                | 3                      | 6                   | 9                 |
| 14                | 7                      | 34                  | 41                |
| 15                | 2                      | 32                  | 34                |
| 16                | 8                      | 11                  | 19                |
| 17                | 22                     | 39                  | 61                |
| 18                | 0                      | 6                   | 6                 |
| 19                | 8                      | 3                   | 11                |
| 20                | 0                      | 8                   | 8                 |
| 21                | 0                      | 7                   | 7                 |
| 22                | 27                     | 7                   | 34                |
| X                 | 5                      | 10                  | 15                |

bp, base pairs; CGH, comparative genomic hybridization; CNVs, copy number variants.
